# Supplementary material
Source: publisher site journal article supplement (https://www.spandidos-publications.com/1760/downloadSupplementary)
Supplement: Supplementary file 2 [file downloadSupplementary]

## Sheet: sorted_otu_table_L6
Table SII. Percentage abundance of bacteria detected in contact lens care solutions.
Taxon					Subject ID
Phylum	Class	Order	Family	Genus	CL-I				CL-II		CL-III			Healthy
					2	7	8	9	1	5	3	4	6	10	11	12	13	14	15
Other	Other	Other	Other	Other	0.0142837	0.00966791	0.0321219	0.012931	0.0264358	0.205217	0.0388601	0.0192093	0.020312	0.0282623	0.0197265	0.0273032	0.0149492	0.00453124	0.0701639
Acidobacteria	[Chloracidobacteria]	RB41	Ellin6075		0	0	0	0	0	0.232219	0	0	0	0	0	0	0	0	0
Actinobacteria	Actinobacteria	Actinomycetales	Other	Other	0	0	0	0	0.0660895	0	0	0	0	0	0	0	0.00498306	0	0
Actinobacteria	Actinobacteria	Actinomycetales			0	0	0	0	0.105743	0	0	0	0	0	0	0	0.0199322	0	0
Actinobacteria	Actinobacteria	Actinomycetales	Actinomycetaceae	Actinobaculum	0	0	0	0	0.00660895	0	0	0	0	0	0.27617	0	0	0	0
Actinobacteria	Actinobacteria	Actinomycetales	Actinomycetaceae	Actinomyces	0.557063	0.188524	0.160609	0.366379	0	0.0108009	0	0	0.0081248	0	0.0854813	0.0117014	0	0	0
Actinobacteria	Actinobacteria	Actinomycetales	Actinomycetaceae	Varibaculum	0	0	0	0	0	0.0108009	0	0	0	0	0	0	0	0	0
Actinobacteria	Actinobacteria	Actinomycetales	Brevibacteriaceae	Brevibacterium	0	0	0	0	3.3243	0	0	0	0	0.440084	0	0	0	0	0
Actinobacteria	Actinobacteria	Actinomycetales	Cellulomonadaceae	Demequina	0	0	0	0	0.0198268	0	0	0	0	0	0	0	0	0	0
Actinobacteria	Actinobacteria	Actinomycetales	Corynebacteriaceae	Corynebacterium	3.0948	1.14565	1.96861	10.9483	0.0132179	0.194416	0.336788	0	8.23448	2.81411	0.631247	1.34956	0.0199322	1.69468	3.24817
Actinobacteria	Actinobacteria	Actinomycetales	Dermabacteraceae	Brachybacterium	0	0	0	0	0.594805	0	0	0	0	0	0	0	0	0.190312	0
Actinobacteria	Actinobacteria	Actinomycetales	Dietziaceae	Other	0	0	0	0	0	0	2.24093	0	0	0	0	0	0	0	0
Actinobacteria	Actinobacteria	Actinomycetales	Intrasporangiaceae	Other	0	0	0	0	0	0.0162013	0.358377	0	0	0	0	0	0	0	0
Actinobacteria	Actinobacteria	Actinomycetales	Intrasporangiaceae	Janibacter	0	0	0	0	0	0	0.00863558	0	0	0	0	0	0	0	0
Actinobacteria	Actinobacteria	Actinomycetales	Microbacteriaceae	Other	0	0	0	0	0.12557	0.0108009	0	0.0192093	0	0	0	0	0.0448475	0.00906249	0
Actinobacteria	Actinobacteria	Actinomycetales	Microbacteriaceae		0	0	0	0	0.0462626	0.00540044	0	0	0	0	0	0	0.00498306	0	0
Actinobacteria	Actinobacteria	Actinomycetales	Microbacteriaceae	Agromyces	0	0	0	0	0.0132179	0	0	0	0	0	0	0	0	0	0
Actinobacteria	Actinobacteria	Actinomycetales	Microbacteriaceae	Cryocola	0	0	0	0	0.0132179	0.0108009	0	0.0192093	0	0	0	0.132616	0	0	0
Actinobacteria	Actinobacteria	Actinomycetales	Microbacteriaceae	Microbacterium	0	0	0	0	2.18095	0.12421	0	0.388029	0	0	0	0	1.03648	0.158594	0
Actinobacteria	Actinobacteria	Actinomycetales	Microbacteriaceae	Mycetocola	0	0	0	0	0.0132179	0	0	0	0	0	0	0	0.00996612	0	0
Actinobacteria	Actinobacteria	Actinomycetales	Microbacteriaceae	Salinibacterium	0	0	0	0	0.0132179	0	0	0	0	0	0	0	0	0	0
Actinobacteria	Actinobacteria	Actinomycetales	Micrococcaceae		0	0	0	0	0.0793074	0	0	0	0	0	0	0	0.0149492	0	0
Actinobacteria	Actinobacteria	Actinomycetales	Micrococcaceae	Arthrobacter	0	0	0	0	0.0264358	0	0	0	0	0	0	0	0.0199322	0	0
Actinobacteria	Actinobacteria	Actinomycetales	Micrococcaceae	Kocuria	0	0	0	0	0.885599	0.0270022	0.928325	0	0	0	0	0	2.57126	0	0
Actinobacteria	Actinobacteria	Actinomycetales	Micrococcaceae	Micrococcus	0	0	0	0	0.495671	0	0	0	0	0	0	0	0	0	0
Actinobacteria	Actinobacteria	Actinomycetales	Micrococcaceae	Renibacterium	0	0	0	0	0	0	0.837651	0	1.0156	0	0.289321	0	0.00498306	0	0.181601
Actinobacteria	Actinobacteria	Actinomycetales	Micrococcaceae	Rothia	1.23792	1.47919	3.36821	0.711207	0.0528716	0	0	0	0	0	0	0	0	0.62078	0.33431
Actinobacteria	Actinobacteria	Actinomycetales	Mycobacteriaceae	Mycobacterium	0	0	0	0	0	0.356429	0	0	0	0	0	0	0.0597967	0	0
Actinobacteria	Actinobacteria	Actinomycetales	Nocardiaceae	Rhodococcus	0	0	0	0	22.3713	0.178215	0.885147	0	0	0	0	0	5.68069	0	0
Actinobacteria	Actinobacteria	Actinomycetales	Propionibacteriaceae	Propionibacterium	0.799886	0.401218	1.24358	6.06034	0.00660895	0.324027	0.00431779	0.718429	1.33247	2.53553	0.802209	1.14674	0.129559	0.0634374	0.66862
Actinobacteria	Actinobacteria	Actinomycetales	Tsukamurellaceae	Tsukamurella	0	0	0	0	0.0330447	0	0	0	0	0	0	0	0	0	0
Actinobacteria	Actinobacteria	Bifidobacteriales	Bifidobacteriaceae	Bifidobacterium	0.352331	0.865278	2.8359	0	0	12.7126	4.52936	0.00384187	0	0	35.5339	0	0	0	0
Actinobacteria	Coriobacteriia	Coriobacteriales	Coriobacteriaceae	Atopobium	0	0	0.399229	0	0	0	0	0	0	0	0	0	0	0	0
Bacteroidetes	Bacteroidia	Bacteroidales	Bacteroidaceae	Bacteroides	0	0	0	0	0	0.129611	0	0	0	0	0	0	0	0	0
Bacteroidetes	Bacteroidia	Bacteroidales	Porphyromonadaceae	Porphyromonas	2.09494	3.27742	1.8906	3.57328	0.0859163	0	0	0	0	0	0	0.378345	0	0	0
Bacteroidetes	Bacteroidia	Bacteroidales	Prevotellaceae	Prevotella	4.59458	4.01702	0.674559	4.20259	0.0264358	0	0	2.44727	0	0	0	0.694282	0	0	0
Bacteroidetes	Bacteroidia	Bacteroidales	[Paraprevotellaceae]	[Prevotella]	1.05699	0.116015	0	0	0	0	0	0	0	0	0	0	0	0	0
Bacteroidetes	Cytophagia	Cytophagales	Cytophagaceae	Spirosoma	0	0	0	0	0	0.189015	0	0	0	0	0	0	0.0797289	0	0
Bacteroidetes	Flavobacteriia	Flavobacteriales	Flavobacteriaceae	Capnocytophaga	0.54278	0.0676754	0	0	0	0	0	0	0	0	0	0	0	0.231093	0
Bacteroidetes	Flavobacteriia	Flavobacteriales	Flavobacteriaceae	Flavobacterium	0	0	0	0.724138	0	0	0	0	0	0	0	0	0	0	0
Bacteroidetes	Flavobacteriia	Flavobacteriales	[Weeksellaceae]	Chryseobacterium	0	0	0	0	21.5782	1.42572	0	0	0	0	0	0	7.15069	0	1.58075
Bacteroidetes	Flavobacteriia	Flavobacteriales	[Weeksellaceae]	Cloacibacterium	0	0	0	0	0	0	0	0	0	2.59205	0	0	0	0	0
Bacteroidetes	Flavobacteriia	Flavobacteriales	[Weeksellaceae]	Elizabethkingia	0	0	0	0	0	0	0	0	0	0.682332	0	0.0117014	0	0	0
Bacteroidetes	Sphingobacteriia	Sphingobacteriales	Sphingobacteriaceae	Pedobacter	0	0	0	0	0	0	0	0	0	0	0	0	0.239187	0	0
Bacteroidetes	Sphingobacteriia	Sphingobacteriales	Sphingobacteriaceae	Sphingobacterium	0	0	0	0	0.31723	0	0	0	0	0	0	0	1.67929	0	0
Bacteroidetes	[Saprospirae]	[Saprospirales]	Chitinophagaceae	Sediminibacterium	0	0	0	0	0	0	0	0	0	0	0	1.32226	0	0	0
Chlamydiae	Chlamydiia	Chlamydiales	Parachlamydiaceae	Other	0	0	1.23899	0	0	0	0	0	0	0	0	0	0	0	0
Chlamydiae	Chlamydiia	Chlamydiales	Parachlamydiaceae	Parachlamydia	0	0	0.00917768	0	0	0	0	0	0	0	0	0	0	0	0
Cyanobacteria	4C0d-2	MLE1-12			0	0	0	0	0	0	0	0	0	0	0	0.312037	0	0	0
Cyanobacteria	Chloroplast	Streptophyta			0	0	0	0	0.0396537	0.0378031	0	0	0	0	0	0	0	0	0
Firmicutes	Bacilli	Bacillales	Other	Other	0	0	0	0	0	0	0.00863558	0	0	0	0	0	0	0	0
Firmicutes	Bacilli	Bacillales	Bacillaceae	Bacillus	0.418988	0	0	0	0	0	0	0	0	0	0	0	0	0	0
Firmicutes	Bacilli	Bacillales	Planococcaceae	Other	0	0	0	0	0.00660895	0	0.0647668	0	0	0	0	0	0	0	0
Firmicutes	Bacilli	Bacillales	Planococcaceae		0.0285673	0.0580074	0.0229442	0.181034	0.0132179	0	0.233161	0	0.060936	0.060562	0.00657549	0.0390046	0	0.00906249	0.0536547
Firmicutes	Bacilli	Bacillales	Staphylococcaceae	Staphylococcus	2.39013	1.77889	1.06461	9.82759	0.641068	0.0270022	15.2979	0	2.07589	1.13453	0.782483	1.61479	0.318916	0.480312	3.11197
Firmicutes	Bacilli	Bacillales	[Exiguobacteraceae]	Exiguobacterium	0	0	0	0	0	0.0756062	0	0	0	0	0	0	0	0	0
Firmicutes	Bacilli	Gemellales	Other	Other	0	0	0	0.00862069	0.00660895	0	0	0	0	0	0	0	0	0	0
Firmicutes	Bacilli	Gemellales	Gemellaceae		2.93768	3.44661	1.33535	3.63362	0.118961	0.0216018	0	0	0	0	0.480011	0.0234028	0	0.258281	0
Firmicutes	Bacilli	Lactobacillales	Other	Other	0	0	0	0	0	0	0	0	0	0	0.013151	0.0351041	0	0	0
Firmicutes	Bacilli	Lactobacillales	Aerococcaceae	Alloiococcus	0	1.16498	0	0	0	0	0	0	0	0.524871	0	0	0	0	0
Firmicutes	Bacilli	Lactobacillales	Carnobacteriaceae	Granulicatella	2.37585	2.01092	3.65272	1.00431	0.00660895	0	0	0	0	0	1.22962	0	0.0249153	0	0
Firmicutes	Bacilli	Lactobacillales	Enterococcaceae	Other	0	0	0	0	0	0.0324027	0	0	0	0	0.0394529	0	0	0	0
Firmicutes	Bacilli	Lactobacillales	Enterococcaceae	Enterococcus	0	0	0	0	0	5.78927	0	0	0	0	17.905	0.737187	0.00498306	0	0.00412729
Firmicutes	Bacilli	Lactobacillales	Lactobacillaceae	Lactobacillus	0	0	1.60609	0	0.0264358	0	0	0	0	0	0	0	0	0	0
Firmicutes	Bacilli	Lactobacillales	Streptococcaceae	Lactococcus	0	0.565573	0	0	0	0	0	0	0	0	0	0	0	0	0
Firmicutes	Bacilli	Lactobacillales	Streptococcaceae	Streptococcus	18.3355	12.839	16.5152	12.1121	0.50228	0.318626	3.07427	0	0.59311	1.21932	3.51789	1.41587	0.279051	0	0
Firmicutes	Clostridia	Clostridiales			0	0	0	1.33621	0	0	0	0	0	0	1.00605	0	0	0	0
Firmicutes	Clostridia	Clostridiales	Clostridiaceae		0	0	0	0	0	0.0648053	0	0	0	0	0	0	0	0	0
Firmicutes	Clostridia	Clostridiales	Clostridiaceae	Clostridium	0	0.0870112	1.4409	0	0	0.0162013	0	0	0	0	0	0	0.0498306	0.317187	0
Firmicutes	Clostridia	Clostridiales	Lachnospiraceae		0	0.729927	0	1.5	0	0	0	0	0	0	0	0	0	0	0
Firmicutes	Clostridia	Clostridiales	Lachnospiraceae	Butyrivibrio	0	0	0	2.35776	0	0	0	0	0	0	0	0	0	0	0
Firmicutes	Clostridia	Clostridiales	Lachnospiraceae	Catonella	0	0	1.17933	0	0	0	0	0	0	0	0	0	0	0	0
Firmicutes	Clostridia	Clostridiales	Lachnospiraceae	Moryella	0.66181	0	0	0	0	0	0	0	0	0	0	0	0	0	0
Firmicutes	Clostridia	Clostridiales	Lachnospiraceae	Oribacterium	0.695139	0	1.75753	2.61638	0	0	0	0	0	0	0	0	0	0	0
Firmicutes	Clostridia	Clostridiales	Peptococcaceae	Peptococcus	0.904633	0	0	0	0	0	0	0	0	0	0	0	0	0	0
Firmicutes	Clostridia	Clostridiales	Peptostreptococcaceae		0	0	0	0	0	0.0756062	0	0	0	0	0	0	0	0	0
Firmicutes	Clostridia	Clostridiales	Peptostreptococcaceae	Peptostreptococcus	0	0	0	0	0.0198268	0	0	0	0	0	0	0	0	0	0
Firmicutes	Clostridia	Clostridiales	Veillonellaceae	Megasphaera	0	0	0	0	0	0.0864071	0	0	0	0	0	0	0	0	0
Firmicutes	Clostridia	Clostridiales	Veillonellaceae	Veillonella	4.16131	2.98255	2.10169	2.50862	0.0396537	0.140412	0	0	0	1.12645	0.427407	0	0	0	0
Firmicutes	Clostridia	Clostridiales	[Mogibacteriaceae]		0.657049	1.33901	0.610316	0	0	0	0	0	0	0	0	0	0	0	0
Firmicutes	Clostridia	Clostridiales	[Mogibacteriaceae]	Mogibacterium	0	0	0	0	0	0	0	0	0	0	0.0328774	0	0	0	0
Firmicutes	Clostridia	Clostridiales	[Tissierellaceae]	Finegoldia	0.461839	0	0	0	0	0.194416	0	0	0	0	0	0	0	0	0
Firmicutes	Clostridia	Clostridiales	[Tissierellaceae]	Parvimonas	0	1.35834	0	0	0	0.0108009	0	0	0	0	0	0	0	0	0
Fusobacteria	Fusobacteriia	Fusobacteriales	Fusobacteriaceae	Fusobacterium	3.38047	3.60613	0	0	0.0330447	0	0.142487	0	0	0	0	0	0	0	0
Fusobacteria	Fusobacteriia	Fusobacteriales	Leptotrichiaceae	Leptotrichia	0	1.88041	1.50973	0.965517	0.0396537	0	0.0604491	0	0	0.100937	0	0	0	0	0
Proteobacteria	Alphaproteobacteria				0	0	0	0	0	0.0324027	0	0	0	0	0	0	0	0	0
Proteobacteria	Alphaproteobacteria	Caulobacterales	Caulobacteraceae	Other	0	0	0	0	0.0198268	0	0	0	0	0	0	0	0	0	0
Proteobacteria	Alphaproteobacteria	Caulobacterales	Caulobacteraceae		0	2.24779	0	0	3.29126	1.2745	0	0	0	0	0	0	2.01814	0.00453124	0
Proteobacteria	Alphaproteobacteria	Rhizobiales	Other	Other	0.00476122	0	0	0	0	0	0	0	0.0040624	0	0	0	0	0	0
Proteobacteria	Alphaproteobacteria	Rhizobiales			0.871304	0	0.725037	0	0.0264358	0.421235	0	0	0	0	0	0	0.42356	0	0.829584
Proteobacteria	Alphaproteobacteria	Rhizobiales	Aurantimonadaceae	Other	0	0	0	0	0.0132179	0	0	0	0	0	0	0	0	0	0
Proteobacteria	Alphaproteobacteria	Rhizobiales	Aurantimonadaceae		0	0	0	0	0.594805	0	0	0	0	0	0	0	1.8238	0	0
Proteobacteria	Alphaproteobacteria	Rhizobiales	Beijerinckiaceae	Chelatococcus	0	0	0	0	0.0132179	0	0	0	0	0	0	0	0.00498306	0	0
Proteobacteria	Alphaproteobacteria	Rhizobiales	Bradyrhizobiaceae	Other	0	0	0	0	0	0	1.35579	0	0	0	0	0	0	0	0
Proteobacteria	Alphaproteobacteria	Rhizobiales	Bradyrhizobiaceae		1.32838	0.874946	0	0	0	0	1.46373	0	0.962788	1.21124	0	0	0	0.0543749	0
Proteobacteria	Alphaproteobacteria	Rhizobiales	Bradyrhizobiaceae	Bradyrhizobium	0.00476122	0.00483395	0	0	0	0	0	0	0	0	0	0	0	0	0
Proteobacteria	Alphaproteobacteria	Rhizobiales	Brucellaceae	Other	0	0	0	0	0	0	0	0	0.231557	0	0	0	0.00498306	0	0
Proteobacteria	Alphaproteobacteria	Rhizobiales	Hyphomicrobiaceae	Devosia	0	0	0	0	0.0132179	0	0	0	0	0	0	0	0	0	0
Proteobacteria	Alphaproteobacteria	Rhizobiales	Methylobacteriaceae		0	0	0.00458884	0	7.61351	0.113409	0	0	0	0	0	0.117014	4.90831	0.326249	0
Proteobacteria	Alphaproteobacteria	Rhizobiales	Methylobacteriaceae	Methylobacterium	0.657049	0	0	0	0	18.4371	0	0	0	0.0161499	0	0	0.478374	0.303593	1.30835
Proteobacteria	Alphaproteobacteria	Rhizobiales	Phyllobacteriaceae	Mesorhizobium	0.085702	0	0	0	0	0	0	0	0	0	0	0	0	0	0
Proteobacteria	Alphaproteobacteria	Rhizobiales	Phyllobacteriaceae	Phyllobacterium	4.72313	3.21458	5.72687	6.47845	0.0264358	0.49144	7.50864	6.34293	7.31232	5.91489	1.54524	4.82487	0.284034	2.11609	1.60964
Proteobacteria	Alphaproteobacteria	Rhizobiales	Rhizobiaceae	Other	0	0	0	0	0.0396537	0	0	0	0	0	0	0.101412	0.0249153	0	0
Proteobacteria	Alphaproteobacteria	Rhizobiales	Rhizobiaceae		0	0	0	0.00431034	0	0.140412	0.00431779	0	0	0	0	0.00780092	0.00498306	0	0
Proteobacteria	Alphaproteobacteria	Rhizobiales	Rhizobiaceae	Agrobacterium	0	0	0	0	8.92208	1.79295	0	0	0	0	0	0	1.5298	0	0
Proteobacteria	Alphaproteobacteria	Rhizobiales	Rhizobiaceae	Rhizobium	0	0	0	0	0	0.00540044	0	0	0	0	0	0.417349	0.0448475	0	0
Proteobacteria	Alphaproteobacteria	Rhodobacterales	Rhodobacteraceae	Paracoccus	0	0	0	0	0	0	0	0	0	0	0	0	0.592984	0	0
Proteobacteria	Alphaproteobacteria	Rhodospirillales	Acetobacteraceae	Roseomonas	0	0.222362	0	0	0	0	0	0	0	0.347222	0	0	0	0	0
Proteobacteria	Alphaproteobacteria	Rickettsiales			0	0	0	0	0	0	0	0	0	0	0	0	0.11461	0	0
Proteobacteria	Alphaproteobacteria	Rickettsiales	mitochondria	Other	0	0	0	0	0	0	0	0	0	0	0.361652	0	0	0	0
Proteobacteria	Alphaproteobacteria	Sphingomonadales	Sphingomonadaceae	Other	0	0	0	0	0	0.0378031	0	0	0	0	0	0	0	0	0
Proteobacteria	Alphaproteobacteria	Sphingomonadales	Sphingomonadaceae		0	0	0	0	0	0.275423	0	0	0	0	0	0	0	0.00906249	0
Proteobacteria	Alphaproteobacteria	Sphingomonadales	Sphingomonadaceae	Sphingobium	0.00476122	0	0	0	0	2.94324	0.00431779	0	0.873416	0	0	0	1.10126	0.00906249	0
Proteobacteria	Alphaproteobacteria	Sphingomonadales	Sphingomonadaceae	Sphingomonas	12.3601	19.8966	2.38161	12.7716	5.00297	2.4896	17.5216	46.6825	13.0037	7.06557	9.4687	3.88486	0.812238	5.13843	8.04821
Proteobacteria	Betaproteobacteria	Burkholderiales	Other	Other	0.00476122	0	0	0	0.0264358	0.0756062	0	0.00384187	0	0.00403747	0	0	0	0	0.0165091
Proteobacteria	Betaproteobacteria	Burkholderiales	Alcaligenaceae	Pigmentiphaga	0	0	0	0	0	0	0	0	0	0	0	0	0.0249153	0	0
Proteobacteria	Betaproteobacteria	Burkholderiales	Burkholderiaceae	Burkholderia	0	0	0	1.65086	0.00660895	0	0	0	0	1.17894	0.00657549	0	0	0	0
Proteobacteria	Betaproteobacteria	Burkholderiales	Comamonadaceae	Other	0.00476122	0.00483395	0.00458884	0	5.9811	0.61565	0	0.00384187	0.0081248	0.0161499	0	0.00390046	0.0647797	0	0.0536547
Proteobacteria	Betaproteobacteria	Burkholderiales	Comamonadaceae		0	0	0	0	0.0859163	0.324027	1.36874	0	0	0	0.00657549	0	0.24417	0	0.784184
Proteobacteria	Betaproteobacteria	Burkholderiales	Comamonadaceae	Comamonas	0	0	0	0	0.0528716	0.199816	0	0	0	0	0	0.00390046	0	0	0.00825457
Proteobacteria	Betaproteobacteria	Burkholderiales	Comamonadaceae	Delftia	3.98038	4.49558	2.57893	2.38793	11.6978	38.2027	11.3903	6.33908	10.936	17.7527	2.68937	2.64451	0.289017	0.271875	53.048
Proteobacteria	Betaproteobacteria	Burkholderiales	Comamonadaceae	Giesbergeria	0	0	0	0	0	0.24842	0	0	0	0	0	0	0	0	0
Proteobacteria	Betaproteobacteria	Burkholderiales	Comamonadaceae	Methylibium	0	0.00483395	0.00458884	0	0.0396537	0.00540044	0	0	0	0	0	0	0	0	0
Proteobacteria	Betaproteobacteria	Burkholderiales	Comamonadaceae	Rubrivivax	0	0	0	0	0.0198268	0.0162013	0	0	0	0	0	0	0.0149492	0	0
Proteobacteria	Betaproteobacteria	Burkholderiales	Oxalobacteraceae		0	0	0	0	0	0.0162013	0	0	0	0	0	12.5556	0	0	0
Proteobacteria	Betaproteobacteria	Neisseriales	Neisseriaceae	Neisseria	3.86135	3.38377	3.70778	2.57328	0.132179	0	0	0	0	1.86127	0	0.00390046	0	0.385156	0
Proteobacteria	Betaproteobacteria	Rhodocyclales	Rhodocyclaceae		0	0	0	0	0.290794	0.113409	0	0	0	0	0	0	0	0	0
Proteobacteria	Deltaproteobacteria	Bdellovibrionales	Bdellovibrionaceae	Bdellovibrio	0	0	0	0	0.132179	0	0	0	0	0	0	0	0.11461	0	0
Proteobacteria	Deltaproteobacteria	Myxococcales	0319-6G20		0	0	0	0	0	0.0216018	0	0	0	0	0	0	0.0298983	0.362499	0
Proteobacteria	Epsilonproteobacteria	Campylobacterales	Campylobacteraceae	Campylobacter	1.15698	0	0	0	0	0	0	0	0	0	0	0	0	0	0
Proteobacteria	Gammaproteobacteria	Aeromonadales	Aeromonadaceae		0	0	0	0	0	0	1.35147	0.157517	0	0	0	0	0	0	0
Proteobacteria	Gammaproteobacteria	Enterobacteriales	Enterobacteriaceae	Other	0	0	0	0	0	0	0	0	0	0	0	0	0	0.0589062	0
Proteobacteria	Gammaproteobacteria	Enterobacteriales	Enterobacteriaceae		0.580869	0.710591	0.00458884	0	0.0198268	0.745261	0	0	0	0	1.30195	0.276933	0.0149492	0.91078	0
Proteobacteria	Gammaproteobacteria	Enterobacteriales	Enterobacteriaceae	Citrobacter	0	0	0.0780103	0	0	0.048604	0	0	0	0	0	0	0	0.0271875	0
Proteobacteria	Gammaproteobacteria	Enterobacteriales	Enterobacteriaceae	Erwinia	0	0	0.0780103	0	0	0	0	0	0	0	0	0	0	83.6875	0
Proteobacteria	Gammaproteobacteria	Enterobacteriales	Enterobacteriaceae	Serratia	0	0	0	0	0	0	0	0	0	0	0	0	0	0.00906249	0
Proteobacteria	Gammaproteobacteria	Oceanospirillales	Halomonadaceae	Halomonas	0	0.43989	0	0	0.00660895	0.0756062	0	1.73268	0	0	0	1.03752	0	0.0407812	0
Proteobacteria	Gammaproteobacteria	Pasteurellales	Pasteurellaceae	Aggregatibacter	0.723706	0	0	0	0.00660895	0	0	0	0	0	0	0	0	0	0
Proteobacteria	Gammaproteobacteria	Pasteurellales	Pasteurellaceae	Haemophilus	3.41856	3.54812	0	2.45259	0.0264358	0	0	0	0	0	0	0	0	0	0
Proteobacteria	Gammaproteobacteria	Pseudomonadales	Moraxellaceae	Acinetobacter	0.66181	0.812104	0.90859	0	0.62785	0	0	1.60206	0	1.02148	0	7.71901	3.0895	0	0
Proteobacteria	Gammaproteobacteria	Pseudomonadales	Moraxellaceae	Enhydrobacter	0	0	1.83095	1.44397	0.0462626	0	0	0	0	0	0	0	0.144509	0.122344	0
Proteobacteria	Gammaproteobacteria	Pseudomonadales	Pseudomonadaceae	Other	0	0	0	0	0	0	0	0	0	0	0	0	0.0149492	0	0
Proteobacteria	Gammaproteobacteria	Pseudomonadales	Pseudomonadaceae		0	0	0	0	0.389928	0.0162013	0.172712	0	0	0	0	0	0.47339	0	0
Proteobacteria	Gammaproteobacteria	Pseudomonadales	Pseudomonadaceae	Pseudomonas	0.00476122	0.966791	0	0	0.304012	0.464438	0.0690846	2.06693	0.410302	0	0	0.358842	57.5593	0.00453124	0
Proteobacteria	Gammaproteobacteria	Salinisphaerales	Salinisphaeraceae	Salinisphaera	0	0	0	0	0	0	0	0	0	0	0.81536	0	0	0	0
Proteobacteria	Gammaproteobacteria	Vibrionales	Pseudoalteromonadaceae	Pseudoalteromonas	0	0	0	0	0	0.0540044	2.40069	1.07188	2.18557	0.0403747	0	1.13893	0	0.0589062	0.420983
Proteobacteria	Gammaproteobacteria	Vibrionales	Vibrionaceae	Vibrio	0.966529	0	0	0	0	0.048604	0	0	0.182808	0	0	0	0	0	0
Proteobacteria	Gammaproteobacteria	Xanthomonadales	Xanthomonadaceae	Other	0.0333286	0.0580074	0.0825991	0.0172414	0.00660895	0.0162013	0.0518135	0.0998886	0.199058	0.157461	0.0460284	0.191123	0	0.0135937	0.0742911
Proteobacteria	Gammaproteobacteria	Xanthomonadales	Xanthomonadaceae		0.899871	1.39218	3.23972	0.422414	0.0660895	0.351029	2.68566	3.21949	5.21612	4.86919	2.32772	5.19931	0.214271	0.380624	2.56717
Proteobacteria	Gammaproteobacteria	Xanthomonadales	Xanthomonadaceae	Rhodanobacter	9.97	12.3072	30.5617	5.14655	0.409755	1.28531	23.601	27.0621	45.1332	44.8805	17.8261	50.2535	1.59956	1.54969	21.9778
Proteobacteria	Gammaproteobacteria	Xanthomonadales	Xanthomonadaceae	Stenotrophomonas	0	0	0	0	0.0132179	5.45445	0	0	0	0.403747	0	0	2.4716	0.117812	0
SR1					0	0	0	0	0.0198268	0	0	0	0	0	0	0	0	0	0
TM7	TM7-3				0.0333286	0	1.46384	0	0	0	0	0	0	0	0	0.00780092	0	0	0
TM7	TM7-3	CW040	F16		1.90449	0	0	0	0	0	0	0	0	0	0	0	0	0	0
TM7	TM7-3	I025	Rs-045		0	0	0	0	0	0	0	0	0	0	0.526039	0	0	0	0
Verrucomicrobia	Verrucomicrobiae	Verrucomicrobiales	Verrucomicrobiaceae	Akkermansia	0	0	0	0	0	0.0918075	0	0	0	0	0	0	0	0	0
